# Supplementary material for: GPX4 Alleviates Diabetes Mellitus-Induced Erectile Dysfunction by Inhibiting Ferroptosis
Source: MDPI journal article supplement (doi:10.3390/antiox11101896), 2022-09-25
Supplement: s1 [file s1]

**Table S1. Antibodies used in this study.**

| Antibody         | Manufacture (catalog number) | Source | Applications |
|------------------|------------------------------|--------|--------------|
| GPX4             | Boster (BM5231)              | Rabbit | WB           |
| GPX4             | Affinity (DF6701)            | Rabbit | IHC          |
| ACSL4            | Affinity (DF12141)           | Rabbit | WB           |
| ACSL4            | Proteintech (22401-1-AP)     | Rabbit | IHC          |
| LPCAT3           | Abclonal (A17604)            | Rabbit | WB           |
| ALOX12           | Santa Cruz (sc-365194)       | Mouse  | WB           |
| ALOX15           | Abclonal (A6864)             | Rabbit | WB           |
| $\beta$ -Actin   | Abclonal (AC026)             | Rabbit | WB           |
| 4-HNE            | Abcam (ab48506)              | Rabbit | IHC          |
| CD31             | Servicebio (GB12063)         | Mouse  | IF           |
| $\alpha$ -SMA    | Servicebio (GB111364)        | Rabbit | IF           |
| $\alpha$ -SMA    | Boster (BM0002)              | Mouse  | WB           |
| eNOS             | Affinity (AF0096)            | Rabbit | WB, IF       |
| p-eNOS           | Affinity (AF3247)            | Rabbit | WB, IF       |
| ROCK1            | Proteintech (21850-1-AP)     | Rabbit | WB           |
| ROCK2            | Boster (PB0428)              | Rabbit | WB           |
| RhoA             | Proteintech (10749-1-AP)     | Rabbit | WB           |
| nNOS             | Servicebio (GB11145)         | Rabbit | IF           |
| TGF- $\beta$ 1   | Affinity (AF1027)            | Rabbit | WB           |
| Smad2/3          | Cell Signaling (D7G7)        | Rabbit | WB           |
| p-Smad2/3        | Cell Signaling (D27F4)       | Rabbit | WB           |
| Collagen type I  | Santa Cruz (sc-293182)       | Mouse  | WB           |
| Collagen type IV | Proteintech (55131-1-AP)     | Rabbit | WB           |
